# Supplementary material for: Cooperative nature of the sulfur centered hydrogen bond: investigation of (H2S)n(n= 2–4) clusters using an affordable yet accurate level of theory
Source: Royal Society of Chemistry journal article supplement (doi:10.1039/c9cp05326c), 2019-01-01
Supplement: c9cp05326c1.pdf [file c9cp05326c1.pdf]

**Supporting Information**  
**for**  
**Cooperative nature of sulfur centered hydrogen**  
**bond: Investigation of  $(\text{H}_2\text{S})_n$  ( $n = 2-4$ ) clusters**  
**using an affordable yet accurate level of theory**

Saptarshi Sarkar, Monu, and Biman Bandyopadhyay\*

*Department of Chemistry, Malaviya National Institute of Technology Jaipur, Jaipur,  
302017, India*

E-mail: [biman.chy@mnit.ac.in](mailto:biman.chy@mnit.ac.in)

**Table S1: Optimized geometries in Cartesian coordinates and normal mode frequencies of H<sub>2</sub>S-dimer calculated at MP2/aug-cc-pV(X+d)Z (X = D, T, Q) level of theories**

| Level of theory         | Cartesian Coordinate ( $\text{\AA}$ ) | Frequencies ( $\text{cm}^{-1}$ ) |
|-------------------------|---------------------------------------|----------------------------------|
| MP2/<br>aug-cc-pV(D+d)Z | H -2.31234000 1.23790500 0.00134500   | 43.3 71.1 93.8                   |
|                         | H -0.74642500 0.08160500 0.00015900   | 95.8 177.5 313.6                 |
|                         | H 2.10622400 -0.81389000 -0.97557700  | 1201.7 1208.7 2729.7             |
|                         | H 2.10490500 -0.82322400 0.96784200   | 2760.9 2779.2 2784.7             |
|                         | S 2.01220400 0.10729400 0.00051500    |                                  |
|                         | S -2.08422700 -0.08744400 -0.00012600 |                                  |
| MP2/<br>aug-cc-pV(T+d)Z | H 2.30259000 1.22666800 0.00157100    | 36.8 65.0 76.9                   |
|                         | H 0.74401700 0.09282600 0.00043500    | 82.0 163.3 290.2                 |
|                         | H -2.05402700 -0.82292000 0.95673500  | 1215.4 1221.8 2734.0             |
|                         | H -2.05504400 -0.81078600 -0.96699800 | 2773.7 2787.4 2792.6             |
|                         | S -2.00316300 0.10589300 0.00066100   |                                  |
|                         | S 2.06956700 -0.08625400 -0.00014500  |                                  |
| MP2/<br>aug-cc-pV(Q+d)Z | H 2.31879500 1.22333700 0.00149800    | 35.4 62.3 70.8                   |
|                         | H 0.74874800 0.10435900 0.00062900    | 79.4 158.7 280.7                 |
|                         | H -2.05656100 -0.82210300 0.95715400  | 1214.1 1219.9 2735.2             |
|                         | H -2.05730400 -0.81040200 -0.96706700 | 2775.7 2789.7 2794.8             |
|                         | S -2.00684900 0.10578900 0.00063100   |                                  |
|                         | S 2.07224400 -0.08673900 -0.00014400  |                                  |

**Table S2: Optimized geometries in Cartesian coordinates and normal mode frequencies of H<sub>2</sub>S-dimer calculated at MP2-CP/aug-cc-pV(X+d)Z (X = D, T, Q) level of theories**

| Level of theory            | Cartesian Coordinate ( $\text{\AA}$ ) | Frequencies ( $\text{cm}^{-1}$ ) |
|----------------------------|---------------------------------------|----------------------------------|
| MP2-CP/<br>aug-cc-pV(D+d)Z | H 2.41002300 1.23144700 -0.00058700   | 36.4 55.4 64.0                   |
|                            | H 0.81920700 0.11040600 0.00011800    | 70.7 146.2 255.3                 |
|                            | S 2.15210400 -0.08842800 0.00005400   | 1201.0 1205.7 2739.6             |
|                            | H -2.16816500 -0.81769900 0.97315700  | 2762.2 2780.4 2786.0             |
|                            | H -2.16702400 -0.82149000 -0.97007600 |                                  |
|                            | S -2.08298200 0.10701200 -0.00021700  |                                  |
| MP2-CP/<br>aug-cc-pV(T+d)Z | H 2.35274200 1.22231700 0.00151700    | 33.8 58.3 66.5                   |
|                            | H 0.77842600 0.11099600 0.00057800    | 74.6 150.9 268.0                 |
|                            | S 2.10069500 -0.08709100 -0.00014400  | 1215.3 1220.5 2740.7             |
|                            | H -2.08846200 -0.82273700 0.95675200  | 2774.1 2787.9 2793.0             |
|                            | H -2.08918500 -0.81082400 -0.96685200 |                                  |
|                            | S -2.03529000 0.10585700 0.00064400   |                                  |
| MP2-CP/<br>aug-cc-pV(Q+d)Z | H 2.33391100 1.22320600 -0.00062000   | 37.5 59.6 65.8                   |
|                            | H 0.76614800 0.10110200 0.00007800    | 75.7 152.7 271.5                 |
|                            | S 2.08974200 -0.08730600 0.00005700   | 1214.0 1219.6 2739.1             |
|                            | H -2.10325900 -0.81132600 0.96389700  | 2776.1 2789.9 2795.1             |
|                            | H -2.10221100 -0.81552100 -0.96045400 |                                  |
|                            | S -2.02065400 0.10621500 -0.00023900  |                                  |

**Table S3: Optimized geometries in Cartesian coordinates and normal mode frequencies of all species calculated at MP2-CP/aug-cc-pV(Q+d)Z level of theory**

| Complex                  | Cartesian Coordinate (Å)                                                                                                                                                                                                                                                                                                                                                                                                                                                               | Frequencies (cm <sup>-1</sup> )                                                                                                                                                                                    |
|--------------------------|----------------------------------------------------------------------------------------------------------------------------------------------------------------------------------------------------------------------------------------------------------------------------------------------------------------------------------------------------------------------------------------------------------------------------------------------------------------------------------------|--------------------------------------------------------------------------------------------------------------------------------------------------------------------------------------------------------------------|
| monomer                  | S 0.00000000 0.00000000 0.10265900<br>H 0.00000000 0.96086000 -0.82127000<br>H 0.00000000 -0.96086000 -0.82127000                                                                                                                                                                                                                                                                                                                                                                      | 1216.3 2779.5 2798.6                                                                                                                                                                                               |
| dimer                    | H 2.33391100 1.22320600 -0.00062000<br>H 0.76614800 0.10110200 0.00007800<br>S 2.08974200 -0.08730600 0.00005700<br>H -2.10325900 -0.81132600 0.96389700<br>H -2.10221100 -0.81552100 -0.96045400<br>S -2.02065400 0.10621500 -0.00023900                                                                                                                                                                                                                                              | 37.5 59.6 65.8<br>75.7 152.7 271.5<br>1214.0 1219.6 2739.1<br>2776.1 2789.9 2795.1                                                                                                                                 |
| anti-trimer              | H 1.08832700 1.21411700 -0.03997500<br>H 0.38203600 2.57187900 -1.21831900<br>S 0.32242000 2.30492800 0.08696400<br>H 1.99942400 -1.53314900 1.24166700<br>H 0.51344100 -1.56567300 0.00935400<br>S 1.84292000 -1.43536200 -0.07916300<br>H -2.44529500 -0.89936000 1.21934300<br>H -1.60247500 0.33650300 -0.00099800<br>S -2.16130500 -0.87733600 -0.08349200                                                                                                                        | 66.8 67.3 75.6<br>80.2 85.2 89.1<br>157.4 160.5 175.8<br>241.3 249.2 386.8<br>1216.5 1218.3 1218.8<br>2712.1 2722.9 2723.9<br>2785.2 2785.5 2785.7                                                                 |
| syn-trimer               | H -1.53270300 0.58515800 -0.02354300<br>H -2.48320100 -0.52009400 1.24152100<br>S -2.27543100 -0.52760400 -0.07579400<br>H 0.78892700 2.40447400 1.24218300<br>H 1.26958700 1.03284900 -0.02770900<br>S 0.68092000 2.23444200 -0.07613900<br>H 1.69802900 -1.88507000 1.24107100<br>H 0.25933300 -1.62524900 -0.01922200<br>S 1.59451200 -1.70634200 -0.07646100                                                                                                                       | 65.8 66.0 79.7<br>79.8 81.9 97.6<br>165.4 166.1 182.6<br>239.7 240.3 383.9<br>1218.3 1219.1 1219.1<br>2711.2 2722.5 2722.8<br>2785.3 2785.4 2785.8                                                                 |
| S <sub>4</sub> -tetramer | H 1.96304000 -0.49701600 -0.28194800<br>H 3.35166400 0.80564100 0.04640900<br>S 2.45549700 0.57679900 -0.91458700<br>H 0.49683300 1.96343000 0.28103500<br>H -0.80629000 3.35197200 -0.04606100<br>S -0.57674400 2.45543800 0.91442600<br>H -1.96394100 0.49705800 -0.28100700<br>H -3.35220300 -0.80642500 0.04589900<br>S -2.45545000 -0.57677000 -0.91435800<br>H -0.49717200 -1.96332600 0.28196200<br>H 0.80557900 -3.35190400 -0.04622400<br>S 0.57685300 -2.45543200 0.91451600 | 6.9 8.7 73.5<br>79.4 79.4 79.8<br>101.5 106.3 106.3<br>112.6 135.3 151.7<br>151.7 164.9 291.3<br>332.9 333.0 397.7<br>1213.3 1216.9 1216.9<br>1220.3 2691.1 2703.2<br>2703.2 2710.0 2783.8<br>2784.0 2784.0 2784.3 |
| C <sub>i</sub> -tetramer | H -1.71865100 1.35495400 0.00533800<br>H -2.98201700 0.57479100 1.24330900<br>S -2.80132000 0.57001500 -0.07805500<br>H -1.34732200 -1.68602900 -0.04208300<br>H -0.69411100 -3.08345900 -1.20683100<br>S -0.56828000 -2.76914900 0.08307800<br>H 1.71871300 -1.35490000 -0.00402200<br>H 2.98590100 -0.57539100 -1.23849900<br>S 2.80110000 -0.56989100 0.08229400<br>H 1.34730400 1.68606900 0.04052000<br>H 0.69476700 3.08681300 1.20166400<br>S 0.56821300 2.76884700 -0.08727900 | 4.8 19.7 71.7<br>78.1 78.9 79.7<br>91.9 95.5 100.0<br>100.9 176.1 177.5<br>184.6 194.8 222.6<br>310.5 319.1 408.3<br>1214.6 1217.6 1218.8<br>1222.5 2692.8 2703.8<br>2706.4 2710.9 2784.8<br>2784.8 2785.4 2785.5  |
